# Supplementary material for: Enhancing Doctors’ Competencies in Communication With and Activation of Older Patients: The Promoting Active Aging (PRACTA) Computer-Based Intervention Study
Source: PubMed Central journal article supplement (PMC5343213; doi:10.2196/jmir.6948), 2017-02-22
Supplement: jmir_v19i2e45_app1.pdf [file jmir_v19i2e45_app1.pdf]

| <b>Pdf article</b>                                                                           | <b>E-learning</b>                                                                                      |                                                             |
|----------------------------------------------------------------------------------------------|--------------------------------------------------------------------------------------------------------|-------------------------------------------------------------|
| Text and images only                                                                         | The same content as in pdf article but supported by other methods, extended with additional activities |                                                             |
| <b>Subjects</b>                                                                              | <b>Methods specific for e-learning</b>                                                                 | <b>Missions<sup>e</sup></b>                                 |
| <b>1. Process of active aging and the importance of an active attitude toward health</b>     |                                                                                                        |                                                             |
| Active and successful aging                                                                  | Presentation guided by a user + quiz <sup>b</sup><br>Mini-lecture + quiz                               | Study a problem<br>Go for a lecture                         |
| Opportunities of resources allocation in older patients                                      | Presentation in a form of interview<br>Case study + quiz                                               | Meet a WHO expert                                           |
| Criteria of an active attitude toward health                                                 | Case study + quiz<br>Mini-lecture                                                                      | Go to GP's office to meet an active older patient           |
| <b>2. Doctors' beliefs about older adults' abilities and expectations</b>                    |                                                                                                        |                                                             |
| ABC model and older adults' activity                                                         | A game + self-assessment + quiz                                                                        | Perform a street interview                                  |
| Stereotypes about the elderly and manifestation of ageism                                    | Presentation guided by a user + quiz<br>Case study + quiz                                              | Go for a meeting with older patients<br>Prepare a poster    |
| Older patients' expectations in GP office                                                    | Presentation guided by a user <sup>c</sup> + quiz<br>Mini-lecture + quiz                               | Participate in a conference                                 |
| <b>3. The importance of physician-patient rapport for older patients and health outcomes</b> |                                                                                                        |                                                             |
| Types of GP-patient rapport                                                                  | Case studies<br>Presentation guided by a user + quiz                                                   | Meet the doctor who investigates older patients' complaints |
| Technics and rules of communication                                                          | Animated cartoon + quiz<br>Presentation guided by a user + quiz                                        | Prepare a guideline on how to proceed                       |
| Strategies of dealing with older patients' emotional needs                                   | Mini-lecture + quiz<br>A video <sup>d</sup> demonstrating technics presented in the module             | Meet an expert<br>Prepare a video                           |
| <b>4. Psychological rules and skills for promoting an active attitude toward health</b>      |                                                                                                        |                                                             |
| Models of health behavior change                                                             | A puzzle<br>Mini-lecture + quiz                                                                        | Go to a lab and meet experts                                |
| Technics – higher level of older patient's motivation                                        | A video demonstrating new skills<br>Analysis of technics + quiz                                        | Join a lab team to solve problems                           |
| Technics – lower level of older patient's motivation                                         | A video demonstrating new skills<br>Analysis of technics + quiz                                        | Join a lab team to solve problems                           |
| <b>5. Quality of life and providing support for older patients</b>                           |                                                                                                        |                                                             |
| Aspects of quality of life                                                                   | Presentation guided by a user + quiz<br>Mini-lecture + quiz                                            | Participate in a teleconference                             |
| GPs' role in improving older patients' quality of life                                       | A video demonstrating new skills<br>Analysis of technics + quiz                                        | Meet experts and watch a video                              |
| GPs as a source of social support for older patients                                         | Presentation guided by a user + quiz<br>Animated cartoon + quiz                                        | Meet experts to solve a problem                             |

<sup>a</sup> the subjects were the same for both forms of intervention

<sup>b</sup> quiz assumed repetition of knowledge or a technic previously presented, its completion allowed to receive a trophy which served as a mnemonic and an award in the game

<sup>c</sup> it assumed that the user decided on the order of subjects' selection

<sup>d</sup> each video presented 8-10 minute GP-older patient conversation and was recorded on the purpose of the project

<sup>e</sup> e-learning was designed as a story. Each module began with a meeting with a Master (unidentified very important person) who ordered missions and ended with a report summarizing a module (it was arranged as another task performed by a user).
