# Supplementary material for: Enhancing Doctors’ Competencies in Communication With and Activation of Older Patients: The Promoting Active Aging (PRACTA) Computer-Based Intervention Study
Source: PubMed Central journal article supplement (PMC5343213; doi:10.2196/jmir.6948), 2017-02-22
Supplement: jmir_v19i2e45_app2.pdf [file jmir_v19i2e45_app2.pdf]

## PRACTA-PES-D

Below, you will find a list of statements referring to various elements of a visit at a doctor's office. Under each statement there is a 7-point response scale. **Please mark with an X the number that describes best, how important is a particular element of the visit for your elderly patients (65+).** Number 1 indicates that it is completely irrelevant, and number 7 – that it is very relevant. Please make sure you answered all questions.

### Usually, during a visit elderly patients (65+) expect me ...

1. ... to find the cause of their symptoms.

1  — 2  — 3  — 4  — 5  — 6  — 7

*Completely irrelevant*

*Very relevant*

2. ... to present them the probable course of their treatment.

1  — 2  — 3  — 4  — 5  — 6  — 7

*Completely irrelevant*

*Very relevant*

3. ... to discuss possible consequences of illness.

1  — 2  — 3  — 4  — 5  — 6  — 7

*Completely irrelevant*

*Very relevant*

### Usually, during a visit the elderly patients (65+) expect me ...

1. ... to present the results of the tests performed.

1  — 2  — 3  — 4  — 5  — 6  — 7

*Completely irrelevant*

*Very relevant*

2. ... to give them advice about medications they take.

1  — 2  — 3  — 4  — 5  — 6  — 7

*Completely irrelevant*

*Very relevant*

3. ... to present recommendations for their treatment.

1  — 2  — 3  — 4  — 5  — 6  — 7

*Completely irrelevant*

*Very relevant*

### Usually, during a visit the elderly patients (65+) expect me ...

1. ... to talk to them about how they feel and how they cope.

1  — 2  — 3  — 4  — 5  — 6  — 7

*Completely irrelevant*

*Very relevant*

2. ... to give them reassurance.

1  — 2  — 3  — 4  — 5  — 6  — 7

*Completely irrelevant*

*Very relevant*

3. ... to show them my care.

1  — 2  — 3  — 4  — 5  — 6  — 7

*Completely irrelevant*

*very relevant*

**Usually, during a visit the elderly patients (65+) expect me ...**

1. ... to talk to them about what harms their health.

1  — 2  — 3  — 4  — 5  — 6  — 7

*Completely irrelevant*

*Very relevant*

2. ... to advise them what they can do to improve their functioning in everyday life.

1  — 2  — 3  — 4  — 5  — 6  — 7

*Completely irrelevant*

*Very relevant*

3. ... to encourage them to make health promoting changes (physical activity, diet).

1  — 2  — 3  — 4  — 5  — 6  — 7

*Completely irrelevant*

*Very relevant*

**Usually, during a visit the elderly patients (65+) expect me ...**

1. ... to suggest how to maintain social relationships.

1  — 2  — 3  — 4  — 5  — 6  — 7

*Completely irrelevant*

*Very relevant*

2. ... to talk with them how to spend time actively.

1  — 2  — 3  — 4  — 5  — 6  — 7

*Completely irrelevant*

*Very relevant*

3. ... to suggest ways of maintaining life satisfaction.

1  — 2  — 3  — 4  — 5  — 6  — 7

*Completely irrelevant*

*Very relevant*

**Usually, during a visit the elderly patients (65+) expect me ...**

1. ... to be benevolent towards them

1  — 2  — 3  — 4  — 5  — 6  — 7

*Completely irrelevant*

*Very relevant*

2. ... to treat them seriously.

1  — 2  — 3  — 4  — 5  — 6  — 7

*Completely irrelevant*

*Very relevant*

3. ... to show them respect.

1  — 2  — 3  — 4  — 5  — 6  — 7

*Completely irrelevant*

*Very relevant*
