# Supplementary material for: Enhancing Doctors’ Competencies in Communication With and Activation of Older Patients: The Promoting Active Aging (PRACTA) Computer-Based Intervention Study
Source: PubMed Central journal article supplement (PMC5343213; doi:10.2196/jmir.6948), 2017-02-22
Supplement: jmir_v19i2e45_app3.pdf [file jmir_v19i2e45_app3.pdf]

## PRACTA-CS-D

Below you'll find a list of various behaviors of a doctor during a visit and a 7-point response scale. **Mark with an X the number that is the closest to how you usually behave with your elderly patients (65+).** We ask for honest answers.

| During visits of my elderly patients (65+) I... |                                               | <i>Very seldom</i>                                                                                                                                                                                                         | <i>Very often</i> |
|-------------------------------------------------|-----------------------------------------------|----------------------------------------------------------------------------------------------------------------------------------------------------------------------------------------------------------------------------|-------------------|
| 1.                                              | ... greet them in a kind manner.              | 1 <input type="checkbox"/> ---- 2 <input type="checkbox"/> ---- 3 <input type="checkbox"/> ---- 4 <input type="checkbox"/> ---- 5 <input type="checkbox"/> ---- 6 <input type="checkbox"/> ---- 7 <input type="checkbox"/> |                   |
| 2.                                              | ... discuss with them the reason for a visit. | 1 <input type="checkbox"/> ---- 2 <input type="checkbox"/> ---- 3 <input type="checkbox"/> ---- 4 <input type="checkbox"/> ---- 5 <input type="checkbox"/> ---- 6 <input type="checkbox"/> ---- 7 <input type="checkbox"/> |                   |
| 3.                                              | ... listen to them carefully.                 | 1 <input type="checkbox"/> ---- 2 <input type="checkbox"/> ---- 3 <input type="checkbox"/> ---- 4 <input type="checkbox"/> ---- 5 <input type="checkbox"/> ---- 6 <input type="checkbox"/> ---- 7 <input type="checkbox"/> |                   |
| 4.                                              | ... show understanding of their problems.     | 1 <input type="checkbox"/> ---- 2 <input type="checkbox"/> ---- 3 <input type="checkbox"/> ---- 4 <input type="checkbox"/> ---- 5 <input type="checkbox"/> ---- 6 <input type="checkbox"/> ---- 7 <input type="checkbox"/> |                   |
| 5.                                              | ... make sure I understood them correctly.    | 1 <input type="checkbox"/> ---- 2 <input type="checkbox"/> ---- 3 <input type="checkbox"/> ---- 4 <input type="checkbox"/> ---- 5 <input type="checkbox"/> ---- 6 <input type="checkbox"/> ---- 7 <input type="checkbox"/> |                   |
| 6.                                              | ... encourage them to ask questions.          | 1 <input type="checkbox"/> ---- 2 <input type="checkbox"/> ---- 3 <input type="checkbox"/> ---- 4 <input type="checkbox"/> ---- 5 <input type="checkbox"/> ---- 6 <input type="checkbox"/> ---- 7 <input type="checkbox"/> |                   |
| 7.                                              | ... answer all their questions.               | 1 <input type="checkbox"/> ---- 2 <input type="checkbox"/> ---- 3 <input type="checkbox"/> ---- 4 <input type="checkbox"/> ---- 5 <input type="checkbox"/> ---- 6 <input type="checkbox"/> ---- 7 <input type="checkbox"/> |                   |
| 8.                                              | ... make sure they understood me correctly.   | 1 <input type="checkbox"/> ---- 2 <input type="checkbox"/> ---- 3 <input type="checkbox"/> ---- 4 <input type="checkbox"/> ---- 5 <input type="checkbox"/> ---- 6 <input type="checkbox"/> ---- 7 <input type="checkbox"/> |                   |
| 9.                                              | ... use language they can understand.         | 1 <input type="checkbox"/> ---- 2 <input type="checkbox"/> ---- 3 <input type="checkbox"/> ---- 4 <input type="checkbox"/> ---- 5 <input type="checkbox"/> ---- 6 <input type="checkbox"/> ---- 7 <input type="checkbox"/> |                   |
| 10.                                             | ... summarize topics we've discussed.         | 1 <input type="checkbox"/> ---- 2 <input type="checkbox"/> ---- 3 <input type="checkbox"/> ---- 4 <input type="checkbox"/> ---- 5 <input type="checkbox"/> ---- 6 <input type="checkbox"/> ---- 7 <input type="checkbox"/> |                   |

| During visits of my elderly patients (65+) I... |                                                                                                                                    | <i>Very seldom</i>                                                                                                                                                                                                         | <i>Very often</i> |
|-------------------------------------------------|------------------------------------------------------------------------------------------------------------------------------------|----------------------------------------------------------------------------------------------------------------------------------------------------------------------------------------------------------------------------|-------------------|
| 11.                                             | ... inform them about the examination.                                                                                             | 1 <input type="checkbox"/> ---- 2 <input type="checkbox"/> ---- 3 <input type="checkbox"/> ---- 4 <input type="checkbox"/> ---- 5 <input type="checkbox"/> ---- 6 <input type="checkbox"/> ---- 7 <input type="checkbox"/> |                   |
| 12.                                             | ... care about their comfort during the examination (i.e. measuring blood pressure).                                               | 1 <input type="checkbox"/> ---- 2 <input type="checkbox"/> ---- 3 <input type="checkbox"/> ---- 4 <input type="checkbox"/> ---- 5 <input type="checkbox"/> ---- 6 <input type="checkbox"/> ---- 7 <input type="checkbox"/> |                   |
| 13.                                             | ... provide as much time as they need for each part of the visit (the interview, preparation for the examination, thinking, etc.). | 1 <input type="checkbox"/> ---- 2 <input type="checkbox"/> ---- 3 <input type="checkbox"/> ---- 4 <input type="checkbox"/> ---- 5 <input type="checkbox"/> ---- 6 <input type="checkbox"/> ---- 7 <input type="checkbox"/> |                   |

| During visits of my elderly patients (65+) I... |  | <i>Very seldom</i> | <i>Very often</i> |
|-------------------------------------------------|--|--------------------|-------------------|
|                                                 |  |                    |                   |

14. ... explain treatment options available in their situation 1□ ---- 2□ ---- 3□ ---- 4□ ---- 5□ ---- 6□ ---- 7□
15. ... explain why they should comply with the recommendations. 1□ ---- 2□ ---- 3□ ---- 4□ ---- 5□ ---- 6□ ---- 7□
16. ... make sure they'll be able to comply with the recommendations. 1□ ---- 2□ ---- 3□ ---- 4□ ---- 5□ ---- 6□ ---- 7□
17. ... write down the main recommendations for them (medications, dosage, etc). 1□ ---- 2□ ---- 3□ ---- 4□ ---- 5□ ---- 6□ ---- 7□
18. ... discuss the plan of further treatment. 1□ ---- 2□ ---- 3□ ---- 4□ ---- 5□ ---- 6□ ---- 7□
19. ...briefly summarize the entire visit. 1□ ---- 2□ ---- 3□ ---- 4□ ---- 5□ ---- 6□ ---- 7□

**During visits of my elderly patients (65+) I...**

*Very seldom*

*Very often*

20. ... encourage them to participate in making decisions. 1□ ---- 2□ ---- 3□ ---- 4□ ---- 5□ ---- 6□ ---- 7□
21. ... give the opportunity to express their opinion. 1□ ---- 2□ ---- 3□ ---- 4□ ---- 5□ ---- 6□ ---- 7□
22. ... take their opinion into account in making decisions. 1□ ---- 2□ ---- 3□ ---- 4□ ---- 5□ ---- 6□ ---- 7□
23. ... create an atmosphere that allows them to discuss intimate issues freely. 1□ ---- 2□ ---- 3□ ---- 4□ ---- 5□ ---- 6□ ---- 7□
24. ... notice their feelings and accept them. 1□ ---- 2□ ---- 3□ ---- 4□ ---- 5□ ---- 6□ ---- 7□
25. ... ensure a good atmosphere during the entire visit. 1□ ---- 2□ ---- 3□ ---- 4□ ---- 5□ ---- 6□ ---- 7□
26. ... win their trust. 1□ ---- 2□ ---- 3□ ---- 4□ ---- 5□ ---- 6□ ---- 7□

*Very seldom*

*Very often*
