# Supplementary material for: Enhancing Doctors’ Competencies in Communication With and Activation of Older Patients: The Promoting Active Aging (PRACTA) Computer-Based Intervention Study
Source: PubMed Central journal article supplement (PMC5343213; doi:10.2196/jmir.6948), 2017-02-22
Supplement: jmir_v19i2e45_app4.pdf [file jmir_v19i2e45_app4.pdf]

## PRACTA-ATH-D

Statements describing various beliefs and feelings related to a visit at a doctor's office are presented below. Please estimate how true are these beliefs and feelings for the elderly patients (65+) who leave your office. **Mark with an X the box by the number from 1 to 7 that describes your response best for each of the statements.**

### Usually, the elderly patients (65+) after a visit at my office...

1. ...understand the nature and cause of their ailments.  
1  ----- 2  ----- 3  ----- 4  ----- 5  ----- 6  ----- 7   
*definitely no* *definitely yes*
2. ... know available treatment options for their ailments.  
1  ----- 2  ----- 3  ----- 4  ----- 5  ----- 6  ----- 7   
*definitely no* *definitely yes*
3. ... understand the results of all their medical tests.  
1  ----- 2  ----- 3  ----- 4  ----- 5  ----- 6  ----- 7   
*definitely no* *definitely yes*
4. ... know how each of their medications works.  
1  ----- 2  ----- 3  ----- 4  ----- 5  ----- 6  ----- 7   
*definitely no* *definitely yes*
5. ... know how to prevent further problems with health.  
1  ----- 2  ----- 3  ----- 4  ----- 5  ----- 6  ----- 7   
*definitely no* *definitely yes*
6. ... know how to sustain or improve health according to their age.  
1  ----- 2  ----- 3  ----- 4  ----- 5  ----- 6  ----- 7   
*definitely no* *definitely yes*

### Usually, the elderly patients (65+) after a visit at my office...

1. ... feel calmer.  
1  ----- 2  ----- 3  ----- 4  ----- 5  ----- 6  ----- 7   
*definitely no* *definitely yes*
2. ... believe the treatment will be effective.  
1  ----- 2  ----- 3  ----- 4  ----- 5  ----- 6  ----- 7   
*definitely no* *definitely yes*
3. ... hope their health will improve.  
1  ----- 2  ----- 3  ----- 4  ----- 5  ----- 6  ----- 7   
*definitely no* *definitely yes*

**Usually, the elderly patients (65+) after a visit at my office...**

1. ... feel depressed.  
1  ----- 2  ----- 3  ----- 4  ----- 5  ----- 6  ----- 7   
*definitely no* *definitely yes*
2. ... have fears about their symptoms.  
1  ----- 2  ----- 3  ----- 4  ----- 5  ----- 6  ----- 7   
*definitely no* *definitely yes*
3. ... doubt that improvement in their functioning is possible.  
1  ----- 2  ----- 3  ----- 4  ----- 5  ----- 6  ----- 7   
*definitely no* *definitely yes*

**Usually, the elderly patients (65+) after a visit at my office...**

1. ... are going to comply to the recommendations conscientiously.  
1  ----- 2  ----- 3  ----- 4  ----- 5  ----- 6  ----- 7   
*definitely no* *definitely yes*
2. ... are going to find out more about their health.  
1  ----- 2  ----- 3  ----- 4  ----- 5  ----- 6  ----- 7   
*definitely no* *definitely yes*
3. ... are making a plan how to comply to the recommendations.  
1  ----- 2  ----- 3  ----- 4  ----- 5  ----- 6  ----- 7   
*definitely no* *definitely yes*
4. ... are going to participate in the treatment actively.  
1  ----- 2  ----- 3  ----- 4  ----- 5  ----- 6  ----- 7   
*definitely no* *definitely yes*

**Usually, the elderly patients (65+) after a visit at my office...**

1. ... are able to cope with the treatment and compliance.  
1  ----- 2  ----- 3  ----- 4  ----- 5  ----- 6  ----- 7   
*definitely no* *definitely yes*
2. ... think they can influence how they'll feel in the future.  
1  ----- 2  ----- 3  ----- 4  ----- 5  ----- 6  ----- 7   
*definitely no* *definitely yes*
3. ... understand that their active participation in treatment and disease prevention is important for their functioning and performance.  
1  ----- 2  ----- 3  ----- 4  ----- 5  ----- 6  ----- 7   
*definitely no* *definitely yes*
