# Supplementary material for: Enhancing Doctors’ Competencies in Communication With and Activation of Older Patients: The Promoting Active Aging (PRACTA) Computer-Based Intervention Study
Source: PubMed Central journal article supplement (PMC5343213; doi:10.2196/jmir.6948), 2017-02-22

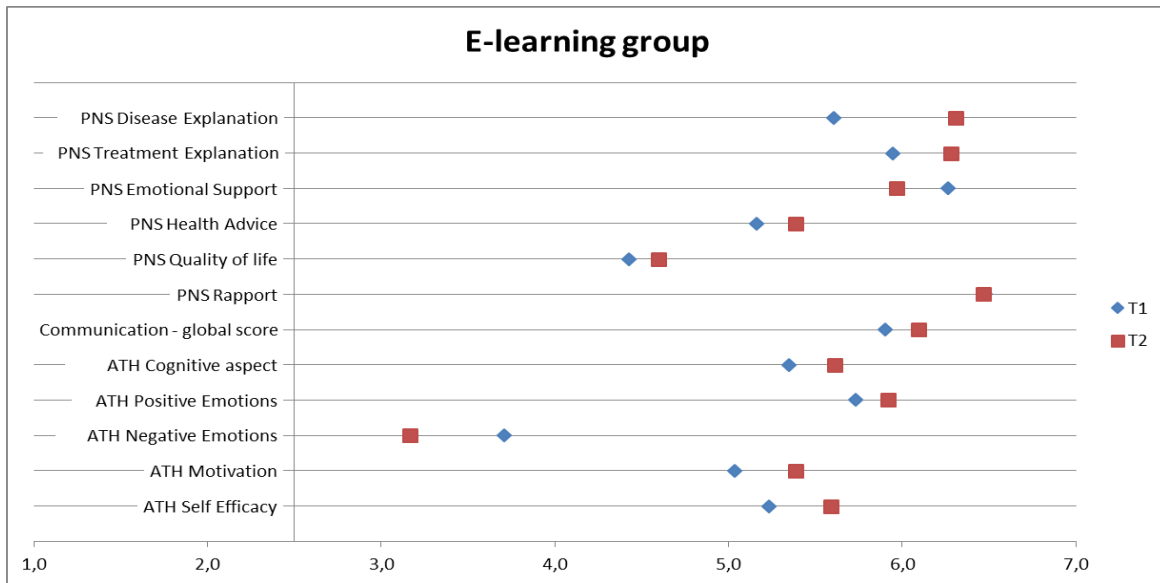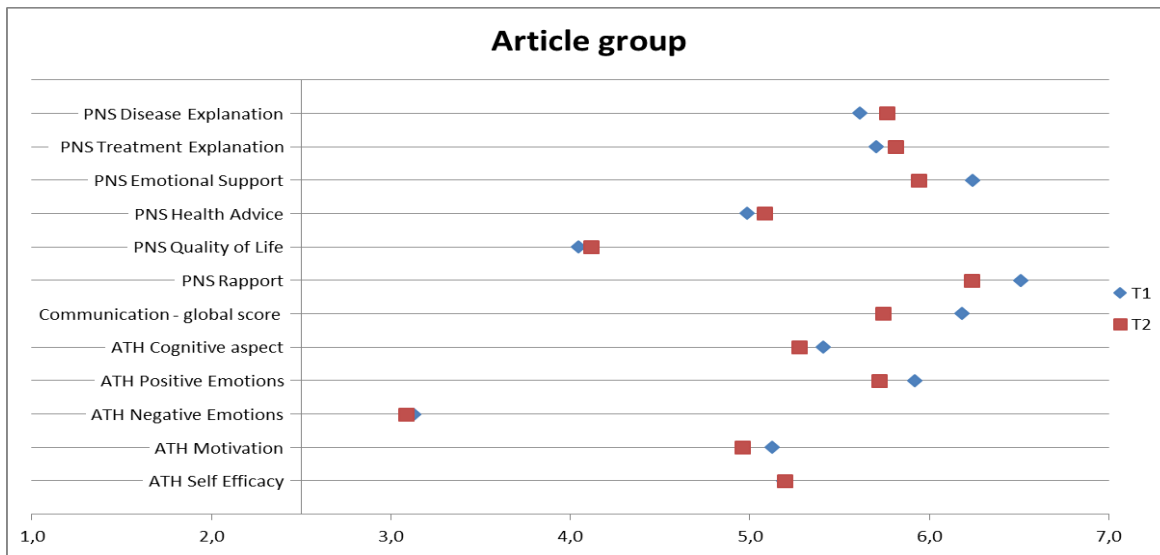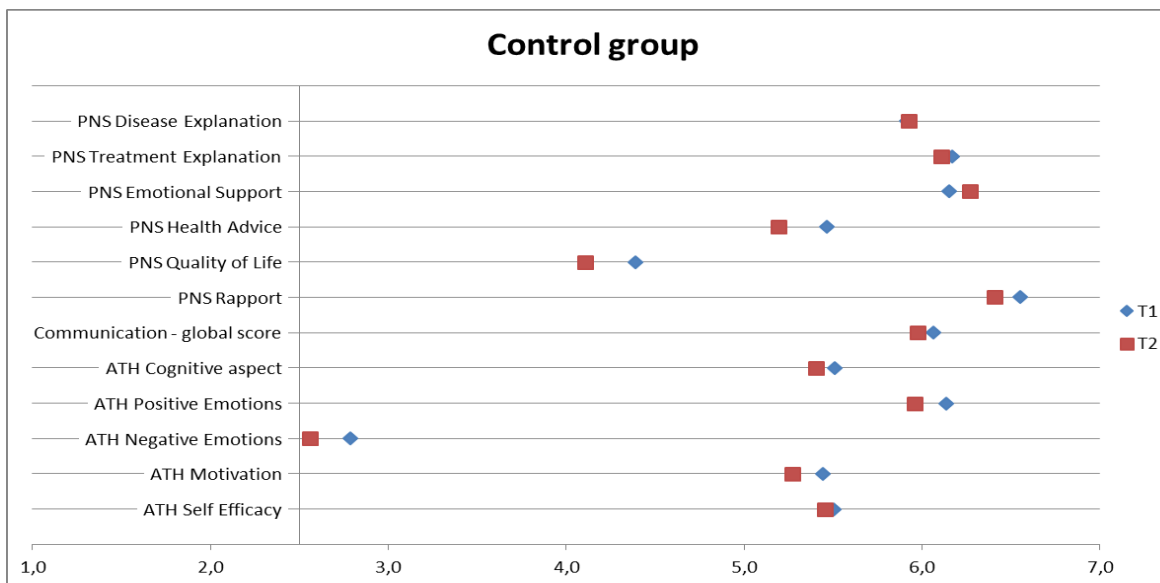

Supplement: jmir_v19i2e45_app5.pdf [file jmir_v19i2e45_app5.pdf]
